# Supplementary material
Source: Springer Nature journal article supplement (https://www.springermedizin.de/resource/supplementary/12961_2012_264_MOESM7_ESM.pdf/9570920)

## Recommended TB R&D Expenditure by country

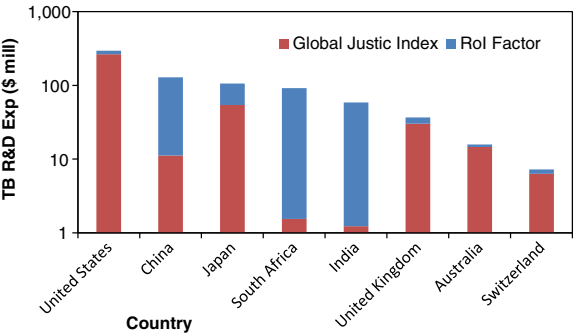

Supplement: MOESM7 [file 9570920]
